# Mutagenesis-visualization: analysis of site saturation mutagenesis datasets in Python

Frank Hidalgo<sup>2,3,4,†</sup>, Sage Templeton<sup>1,2,3</sup>, Che Olavarria Gallegos<sup>5</sup> and Joanne Wang<sup>1,2,3</sup>

<sup>1</sup>Department of Molecular and Cell Biology, Berkeley, Berkeley, CA, United States; <sup>2</sup>California Institute for Quantitative Biosciences (QB3), University of California, Berkeley, Berkeley, CA, United States; <sup>3</sup>Howard Hughes Medical Institute, University of California, Berkeley, Berkeley, CA, United States; <sup>4</sup>Department of Chemistry, University of California, Berkeley, Berkeley, CA, United States; <sup>5</sup>Department of Chemistry, Carnegie Mellon University, Pittsburgh PA

† To whom correspondence should be addressed: [fhidalgoruiz@berkeley.edu](mailto:fhidalgoruiz@berkeley.edu)

## Abstract

**Summary:** Site saturation mutagenesis (SSM) experiments have been transformative in our study of protein function. Despite the rich data generated from such experiments, current tools for processing, analyzing, and visualizing the data offer only a limited set of static plots that are difficult to customize. Furthermore, usage of the tools requires extensive experience and programming. This slows the research process for those in the biological field who are unfamiliar with programming. Here, we introduce *mutagenesis-visualization*, a Python API for the creation of publication-quality figures for SSM datasets which requires no prior Python or statistics experience. The plots can be rendered as native *matplotlib* objects (easy to stylize) or as *Plotly* objects (interactive graphs). Additionally, the software offers the possibility to visualize the datasets on *Pymol*.

**Availability and implementation:** The software can be installed from *PyPI* or *GitHub* using the *pip* package manager and is compatible with Python  $\geq 3.8$ . The [documentation](#) can be found at *readthedocs* and the [source code](#) can be found on *GitHub*.

## Introduction

Site saturation mutagenesis (also known as deep mutational scanning) allows the comprehensive study of all possible amino acids of a protein simultaneously in an unbiased fashion (Tripathi and Varadarajan 2014; Fowler and Fields 2014; Nov 2012; Shin and Cho 2015; Wrenbeck et al. 2017; Araya and Fowler 2011). A library of single-codon variants is plugged into an assay, where mutations in the protein will affect functional selection. The library is retrieved from the before and after selection samples, and using next-generation sequencing, the counts of each variant are used to calculate an enrichment score. Numerous applications have been pursued using SSM, including drug resistance prediction (Pines et al. 2020), protein engineering (Shin and Cho 2015), allostery determination (Subramanian et al. 2021), and functional analyses of genomes (Li et al. 2016).

A substantial number of software tools for different parts of the bioinformatics pipeline have been described in the literature. For DNA library design, *Mutation Maker* and *OneClick* let users design oligos according to different specifications and much more (Tang et al. 2012; Hiraga et al. 2021). For the preprocessing of DNA reads, *FLASH* and *PEAR* tools merge paired-end reads, *Cutadapt* and *trimmomatic* remove adapter sequences (Zhang et al. 2014; Bolger et al. 2014) and QUASR provides a framework for quantification and analysis of short reads (Gaidatzis et al. 2015). For calculating enrichment scores and statistical analysis, *DiMSsum*, *enrich2*, *dms\_tools2*, and *DESeq2* use different statistical models to quantify the errors, treat replicates, and time series, (Love et al. 2014; Rubin et al. 2017; Bloom 2015; Faure et al. 2020). This subset of tools may also integrate a preprocessing module. Lastly, for the identification of molecular constraints that affect enrichment scores, there is *dms2dfe* (Dandage and Chakraborty 2017).

While the current tools allow the user to calculate enrichment scores and error estimates from raw sequencing data, they have only a few built-in static visualization options such as heatmaps, logos, and scatters. Customizing these plots and/or creating further plots requires a high knowledge of programming and extensive data wrangling. This makes the creation of publication-quality figures challenging and time-consuming. None of these packages allow plots to be visualized interactively, and there is no integration with *Pymol* (Schrödinger 2015). Thus, overlaying enrichment scores onto a PDB structure must be done by hand, slowing the data analysis process. Here, we describe *mutagenesis-visualization*, a Python package that addresses the aforementioned needs.

## Implementation

*Mutagenesis-visualization* is a user-centered Python API for processing, analyzing, and creating high-quality figures for publication from pairwise SSM datasets. Unlike other packages, *mutagenesis-visualization* handles all the data wrangling internally, streamlining the workflow. The workflow of the software consists of two main steps: (i) processing of DNA reads and calculation of enrichment scores and (ii) analysis and visualization. The first step is to count the DNA reads for each variant, and then, from pre-selection and post-selection samples, the enrichment score of each variant can be calculated. *Mutagenesis-visualization* has several options for processing and normalizing datasets. Due to the modularity of our software, this first step can be conducted separately on other software packages, and the data can be integrated back into the *mutagenesis-visualization* pipeline for further visualization analysis. Once the enrichment scores are calculated, different types of visualizations can be conducted.

These datasets are commonly represented with heatmaps. In *mutagenesis-visualization*, heatmaps are highly tunable (Figure 1.A). The user can change all stylistic aspects such as size, labels, color scheme, protein cartoon. These heatmaps can also be customized by choosing protein residues of interest or by selecting a subset of amino acids. Heatmaps with average substitutions can be generated for the easy visualization of global phenotypic trends of the variants (Figure 1.B). Since heatmaps are just one method of visualizing data, *mutagenesis-visualization* provides tools for plotting data sets through histograms, scatter plots, line plots, and bar charts (Figure 1.D, 1.E, 1.H). To aid the analysis of data, *mutagenesis-visualization* includes tools for hierarchical clustering, correlations (Figure 1.C), PCA (Figure 1.G), and ROC (Figure 1.F) curves. The *matplotlib* axes objects (Hunter 2007) can be retrieved, allowing for a high level of customization. Furthermore, most of the visualizations, including heatmaps, can also be generated using *Plotly*, which allows for interactive plots with hover features and dashboard creation. We have created a sample [dashboard](#) on *Heroku* to illustrate the capabilities of the software. Lastly, *mutagenesis-visualization* allows for data to be easily exported and visualized onto a PDB structure on *Pymol* (Figure 1.I).

*Mutagenesis-visualization* is designed to be run locally and does not require a high-performance computing environment. The software can be installed from *PyPI* or *GitHub* using the *pip* package manager and is compatible with Python  $\geq 3.8$ . The source code is available in the *GitHub* [repository](#). The [documentation](#) contains a step-by-step tutorial on the different types of plots, and a live version of the [tutorial](#) is hosted on *mybinder* (Jupyter et al. 2018) and can be run remotely without the need for any installation. The tutorial includes the analysis of sample SSM datasets from various studies (Dou et al. 2018; Fernandes et al. 2016; Livesey and Marsh 2020; Melnikov et al. 2014; Newberry et al. 2020; Stiffler et al. 2015; Bandaru et al. 2017).

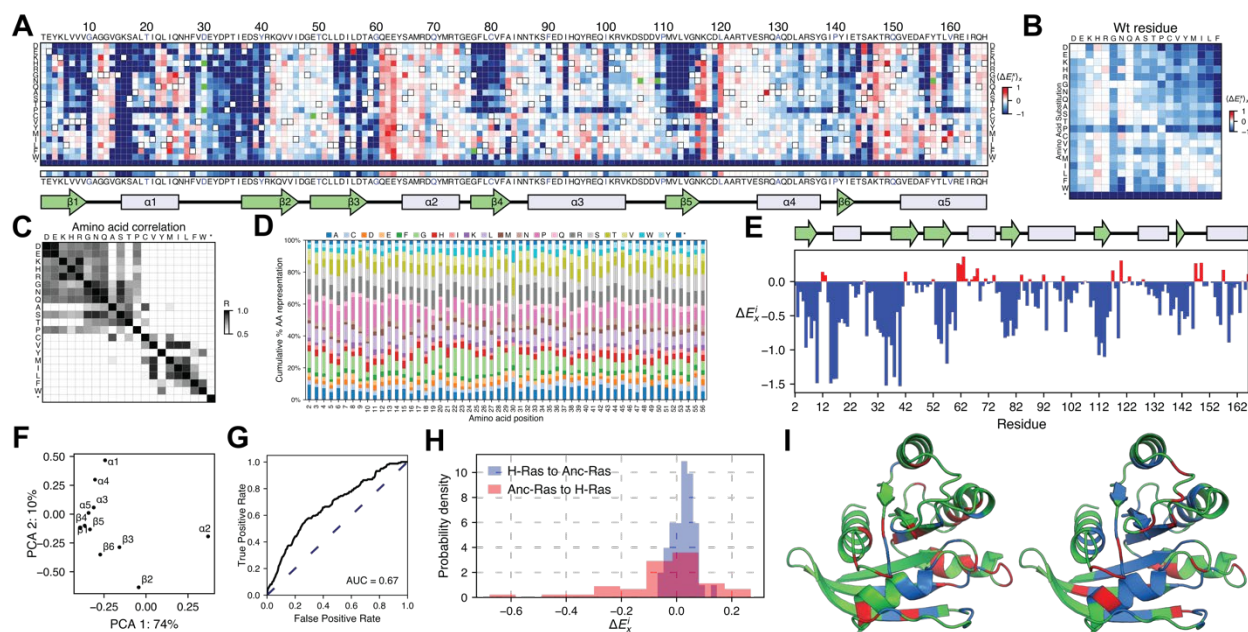

**Figure 1.** *Mutagenesis-visualization* can produce several types of plots. The user passes into the software a *pandas* dataframe (McKinney 2010) or *numpy* array (Harris et al. 2020) containing the enrichment scores, the protein sequence, and, optionally, the secondary structure. The user can generate each of the following plots using a one-line command. The data used to generate the plots was obtained from replicating previous work on H-Ras (Bandaru et al. 2017). For figures A, B, E, and I, shades of red, and blue indicate gain and loss of function, respectively. (A) A heatmap representing enrichment scores for substituting a particular residue in H-Ras with one of the 20 amino acids. The cartoon indicates the secondary structure motifs. (B) A heatmap with average amino acid substitution effects in H-Ras. (C) A correlation plot where the Pearson R-value is calculated for each amino acid substitution. (D) A bar plot representing the cumulative % of each amino acid substitution in the DNA library grouped by residue. The library was used to conduct the H-Ras SSM experiment. Each amino acid is coded with a different color. (E) A bar plot representing the average amino acid substitution effect per residue in H-Ras. (F) A scatter plot of the first two dimensions of a principal component analysis (PCA) conducted on the H-Ras dataset, which had been grouped by the secondary structure. (G) A receiver operating characteristic (ROC) plot used to make a quantitative determination of the fit between the measured enrichment scores and binary classification of the variants. The binary classification could represent any property such as the sequence conservation, whether it is found in a cancer screen database, etc. (H) A histogram plot of the enrichment scores of all the sequence changes required for the H-Ras protein sequence to revert to Ancestral Ras, and vice versa. 48 residues that differ between the two protein sequences (Bandaru et al. 2017). The data from the Ancestral Ras experiment are unpublished. (I) Two *Pymol*-generated figures obtained from mapping the alanine (left) and aspartate (right) enrichment scores to the 5P21 PDB structure on *Pymol*. The user needs a valid *Pymol* license, as well as having the same Python path for *Pymol* and the virtual environment being used to run this software.

## Conclusion

*Mutagenesis-visualization* fills a need in the Python and scientific community for user-friendly software that streamlines the pairwise SSM bioinformatics pipeline. While the workflow allows for end-to-end analysis of the preprocessed datasets, its modularity allows the user to perform the data processing using alternative software and integrate the data back into *mutagenesis-visualization* to conduct the analysis and visualization. Installation, API description, as well as a comprehensive, step-by-step tutorial, can be found online.

## Acknowledgments

The authors thank Prof. John Kuriyan, Subu Subramanian, and all the members of the Kuriyan lab for their insightful discussions.

## Funding

This work was supported by grants from the National Institute of Health (PO1-AI091580) and The Howard Hughes Medical Institute to Professor John Kuriyan.

*Conflict of Interest:* none declared.

## Bibliography

- Araya, C.L. and Fowler, D.M. 2011. Deep mutational scanning: assessing protein function on a massive scale. *Trends in Biotechnology* 29(9), pp. 435–442.
- Bandaru, P., Shah, N.H., Bhattacharyya, M., et al. 2017. Deconstruction of the Ras switching cycle through saturation mutagenesis. *eLife* 6.
- Bloom, J.D. 2015. Software for the analysis and visualization of deep mutational scanning data. *BMC Bioinformatics* 16, p. 168.
- Bolger, A.M., Lohse, M. and Usadel, B. 2014. Trimmomatic: a flexible trimmer for Illumina sequence data. *Bioinformatics* 30(15), pp. 2114–2120.
- Dandage, R. and Chakraborty, K. 2017. dms2dfe: Comprehensive Workflow for Analysis of Deep Mutational Scanning Data. *The Journal of Open Source Software* 2(20), p. 362.
- Dou, J., Vorobieva, A., Sheffler, W., et al. 2018. De Novo Design Of A Fluorescence-Activating B-Barrel. *Zenodo*.
- Faure, A.J., Schmiedel, J.M., Baeza-Centurion, P. and Lehner, B. 2020. DiMSum: an error model and pipeline for analyzing deep mutational scanning data and diagnosing common experimental pathologies. *Genome Biology* 21(1), p. 207.
- Fernandes, J.D., Faust, T.B., Strauli, N.B., et al. 2016. Functional segregation of overlapping genes in HIV. *Cell* 167(7), p. 1762–1773.e12.
- Fowler, D.M. and Fields, S. 2014. Deep mutational scanning: a new style of protein science. *Nature Methods* 11(8), pp. 801–807.
- Gaidatzis, D., Lerch, A., Hahne, F. and Stadler, M.B. 2015. QuasR: quantification and annotation of short reads in R. *Bioinformatics* 31(7), pp. 1130–1132.
- Harris, C.R., Millman, K.J., van der Walt, S.J., et al. 2020. Array programming with NumPy. *Nature* 585(7825), pp. 357–362.
- Hiraga, K., Mejzlik, P., Marcisin, M., et al. 2021. Mutation maker, an open source oligo design platform for protein engineering. *ACS synthetic biology [electronic resource]* 10(2), pp. 357–370.
- Hunter, J.D. 2007. Matplotlib: A 2D Graphics Environment. *Computing in science & engineering* 9(3), pp. 90–95.
- Li, C., Qian, W., Maclean, C.J. and Zhang, J. 2016. The fitness landscape of a tRNA gene. *Science* 352(6287), pp. 837–840.
- Livesey, B.J. and Marsh, J.A. 2020. Using deep mutational scanning to benchmark variant effect predictors and identify disease mutations. *Molecular Systems Biology* 16(7), p. e9380.
- Love, M.I., Huber, W. and Anders, S. 2014. Moderated estimation of fold change and dispersion for RNA-seq data with DESeq2. *Genome Biology* 15(12), p. 550.
- McKinney, W. 2010. Data structures for statistical computing in python. In: *Proceedings of the 9th Python in Science Conference*. Proceedings of the python in science conference. SciPy, pp. 56–61.
- Melnikov, A., Rogov, P., Wang, L., Gnirke, A. and Mikkelsen, T.S. 2014. Comprehensive mutational scanning of a kinase in vivo reveals substrate-dependent fitness landscapes. *Nucleic Acids Research* 42(14), p. e112.
- Newberry, R.W., Leong, J.T., Chow, E.D., Kampmann, M. and DeGrado, W.F. 2020. Deep mutational scanning reveals the structural basis for  $\alpha$ -synuclein activity. *Nature Chemical Biology* 16(6), pp. 653–659.
- Nov, Y. 2012. When second best is good enough: another probabilistic look at saturation mutagenesis. *Applied and Environmental Microbiology* 78(1), pp. 258–262.



- Pines, G., Fankhauser, R.G. and Eckert, C.A. 2020. Predicting drug resistance using deep mutational scanning. *Molecules (Basel, Switzerland)* 25(9).
- Rubin, A.F., Gelman, H., Lucas, N., et al. 2017. A statistical framework for analyzing deep mutational scanning data. *Genome Biology* 18(1), p. 150.
- Schrödinger, L.L.C. 2015. The {PyMOL} Molecular Graphics System, Version~1.8.
- Shin, H. and Cho, B.-K. 2015. Rational protein engineering guided by deep mutational scanning. *International Journal of Molecular Sciences* 16(9), pp. 23094–23110.
- Stiffler, M.A., Hekstra, D.R. and Ranganathan, R. 2015. Evolvability as a function of purifying selection in TEM-1  $\beta$ -lactamase. *Cell* 160(5), pp. 882–892.
- Subramanian, S., Gorday, K., Marcus, K., et al. 2021. Allosteric communication in DNA polymerase clamp loaders relies on a critical hydrogen-bonded junction. *eLife* 10.
- Tang, L., Gao, H., Zhu, X., Wang, X., Zhou, M. and Jiang, R. 2012. Construction of “small-intelligent” focused mutagenesis libraries using well-designed combinatorial degenerate primers. *Biotechniques* 52(3), pp. 149–158.
- Tripathi, A. and Varadarajan, R. 2014. Residue specific contributions to stability and activity inferred from saturation mutagenesis and deep sequencing. *Current Opinion in Structural Biology* 24, pp. 63–71.
- Wrenbeck, E.E., Faber, M.S. and Whitehead, T.A. 2017. Deep sequencing methods for protein engineering and design. *Current Opinion in Structural Biology* 45, pp. 36–44.
- Zhang, J., Kobert, K., Flouri, T. and Stamatakis, A. 2014. PEAR: a fast and accurate Illumina Paired-End reAd mergeR. *Bioinformatics* 30(5), pp. 614–620.
